# Supplementary material
Source: publisher figshare collection journal article supplement (https://acs.figshare.com/ndownloader/files/3915763)
Supplement: Supplementary file 1 [file 3915763]

## Enhanced Crystallization Rate of Poly(L-lactic acid) (PLLA) by Polyoxymethylene (POM) Fragment Crystals in the PLLA/POM Blends with Small Amount of POM

Jishan Qiu <sup>a</sup>, Jipeng Guan <sup>a</sup>, Hengti Wang <sup>a</sup>, Shanshan Zhu <sup>a</sup>, Xiaojun Cao <sup>a</sup>, Quan-lin Ye <sup>b</sup> and Yongjin Li <sup>a\*</sup>

<sup>a</sup> College of Material, Chemistry and Chemical Engineering, Hangzhou Normal University, Hangzhou 310036, China

<sup>b</sup> Department of Physics, Hangzhou Normal University, Hangzhou 310036, China

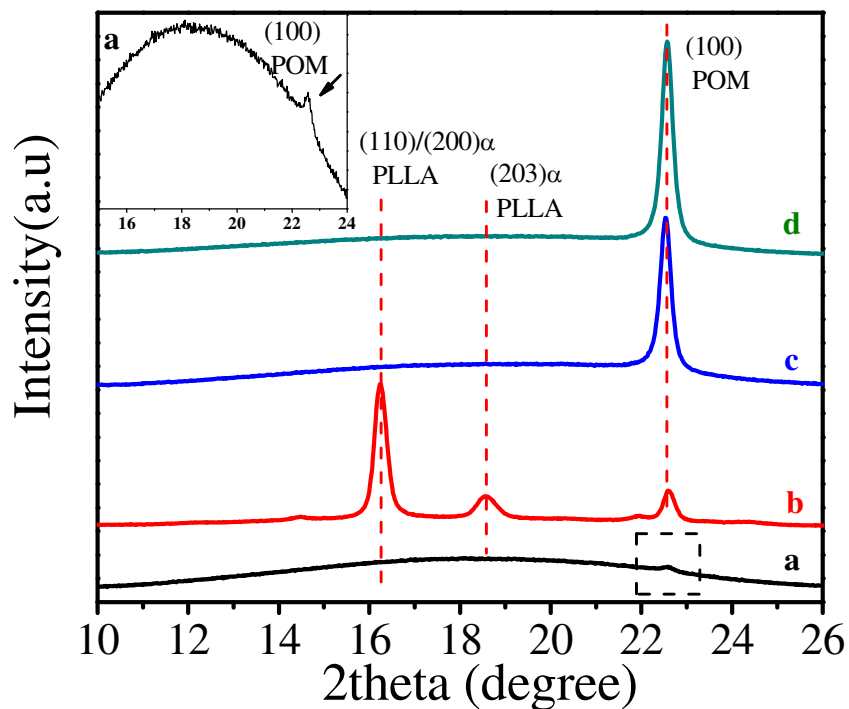

Figure S1. Wide-angle X-ray diffraction curves of samples: (a) PLLA/POM=93/7 (quenched), (b) PLLA/POM=93/7 (cooling at 10 °C/min), (c) PLLA/POM=80/20 (quenched) and (d) PLLA/POM=80/20 (cooling at 10 °C/min).

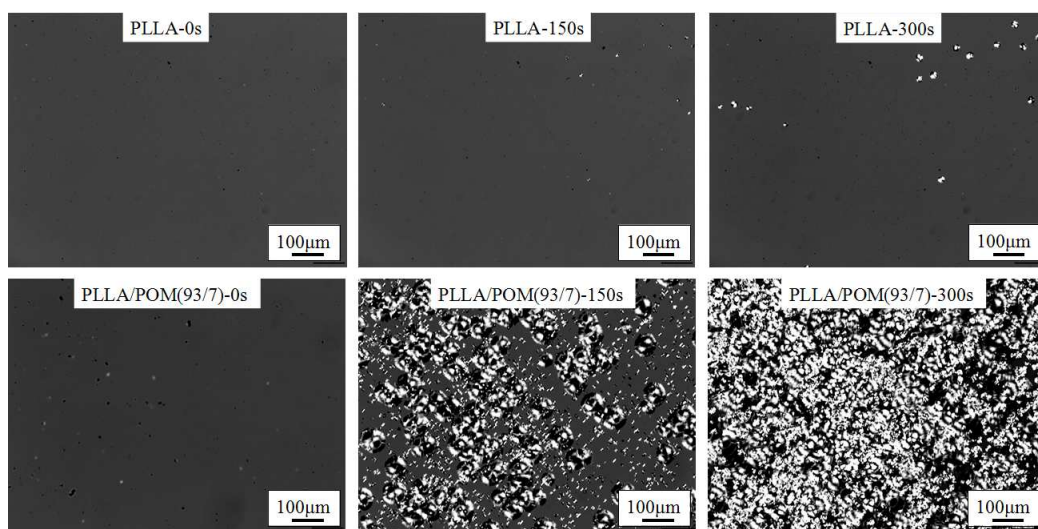

Figure S2. Polarized optical micrographs for PLLA and PLLA/POM(93/7). These samples were crystallized at 135 °C from the melt for various times as indicated in images.

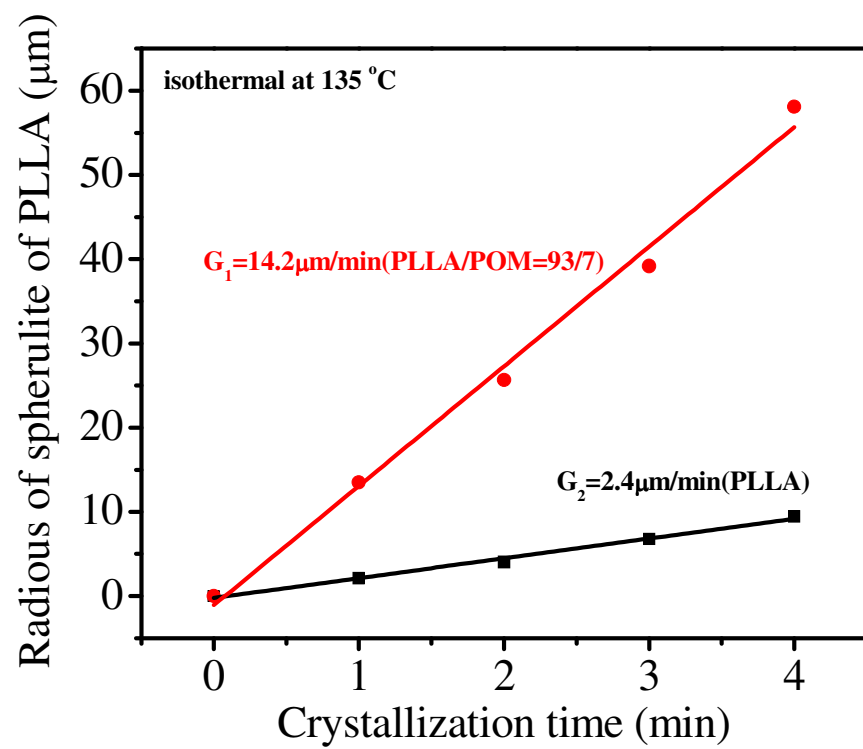

Figure S3. Change of radius of PLLA spherulite as function of crystallization time.

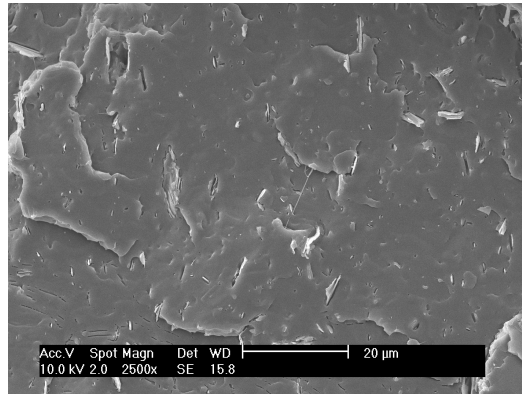

Figure S4. SEM image for the PLLA/5% talc.
